# Supplementary material for: Regulation of hepatic LDL receptors by mTORC1 and PCSK9 in mice
Source: JCI journal article supplement (doi:10.1172/jci61919), 2012-03-19
Supplement: sd1 [file 1]

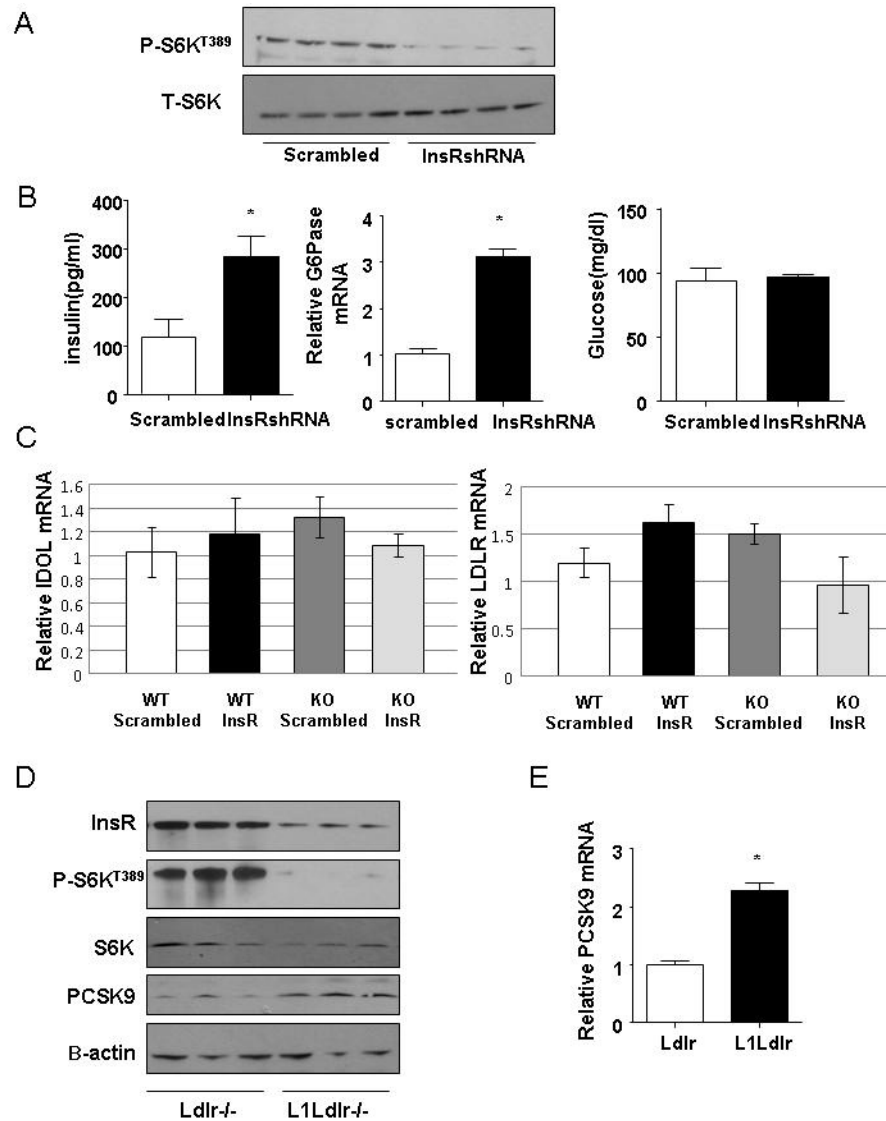

**FigureS1** (A) Protein level of hepatic p-S6K<sup>T389</sup> and total S6K were measured in mice with Scrambled or InsRshRNA. (B) The plasma insulin, glucose and hepatic Glucose-6-Phosphotase mRNA level in the C57/BL6 mice which were injected with InsRshRNA adenovirus and sac on the 11<sup>th</sup> day. (C) Hepatic *Ldlr* and *Idol* mRNA level in WT and PCSK9 knockout with InsRshRNA. (D) Western blot analysis of InsR, p-S6K<sup>T389</sup>, total S6K, and Pcsk9 proetin levels in the liver of *Ldlr*<sup>-/-</sup> and *L1Ldlr*<sup>-/-</sup> mice. (E) Analysis of hepatic Pcsk9 gene expression by Q-PCR in *Ldlr*<sup>-/-</sup> and *L1Ldlr*<sup>-/-</sup> mice. \*P<0.05, n=4-5.

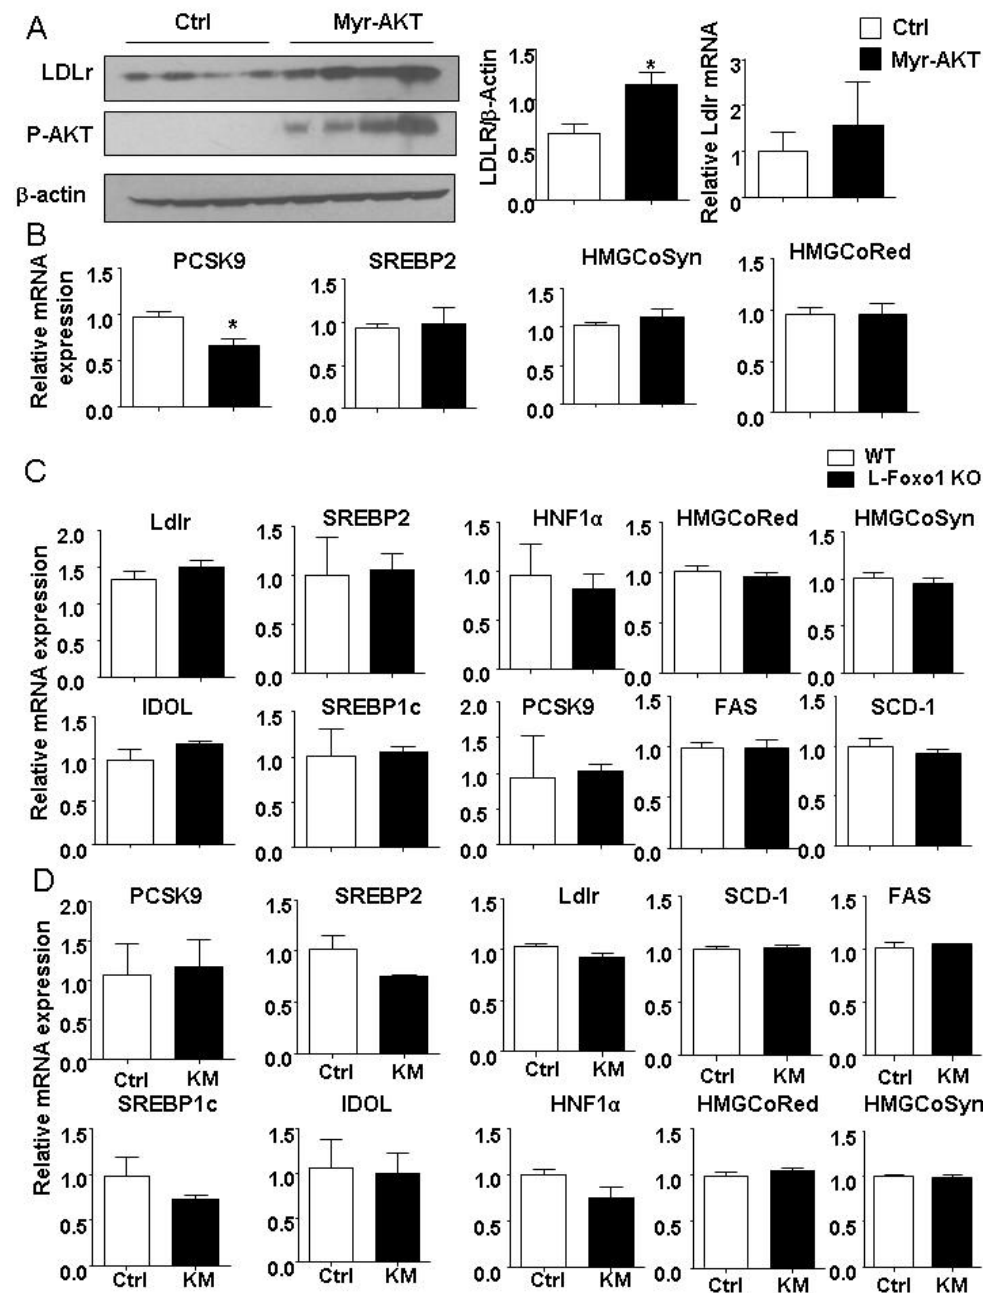

**FigureS2** (A) The C57/Bl6 mice were injected with myr-AKT adenovirus and sac in the 11<sup>th</sup> day. Immunoblots of LDLR, p-AKT and β-actin. (B) The hepatic gene expression was measured in the mice with myr-AKT or empty adenovirus. (C) The gene expression was measured in the liver of WT and L-foxO1 mice. (D) Q-PCR was performed to measure the gene expression in the liver of control or GSK-KM mice. \*P<0.05, N=4-5

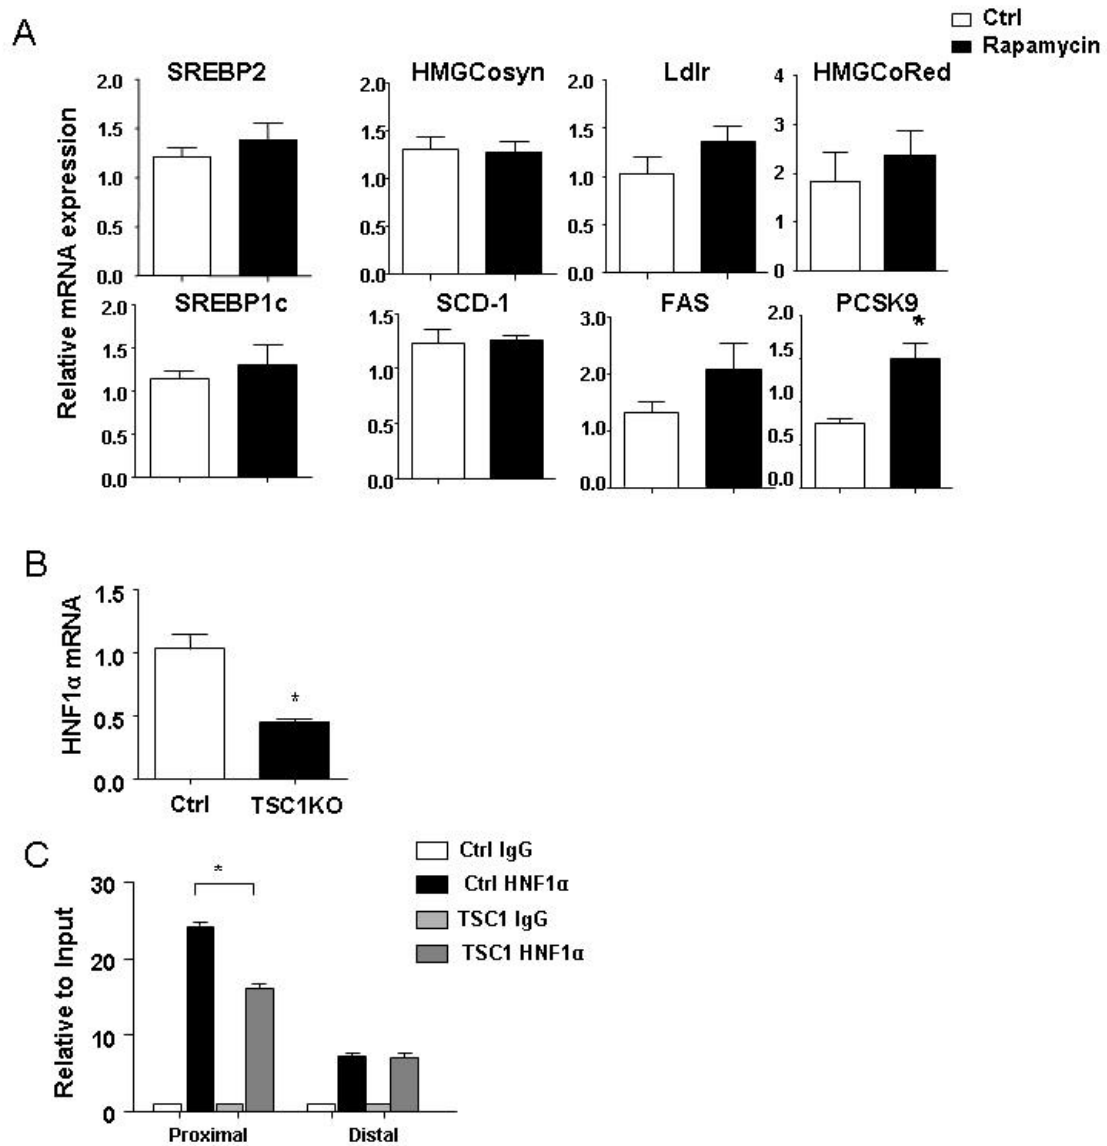

**FigureS3** (A) The mRNA level of *Ldlr*, *Pcsk9*, *Srebp1c*, *Srebp2*, and their target genes in mice treated with rapamycin (Rapa). (B) The mRNA level of *Hnf1α* in the liver of Ctrl or *Li-TSCI*<sup>-/-</sup> mice. (C) *Pcsk9* promoter ChIP assay in the liver of Ctrl or *Li-TSCI*<sup>-/-</sup> mice using the HNF1α or IgG antibody. \*P<0.05, N=4-5.

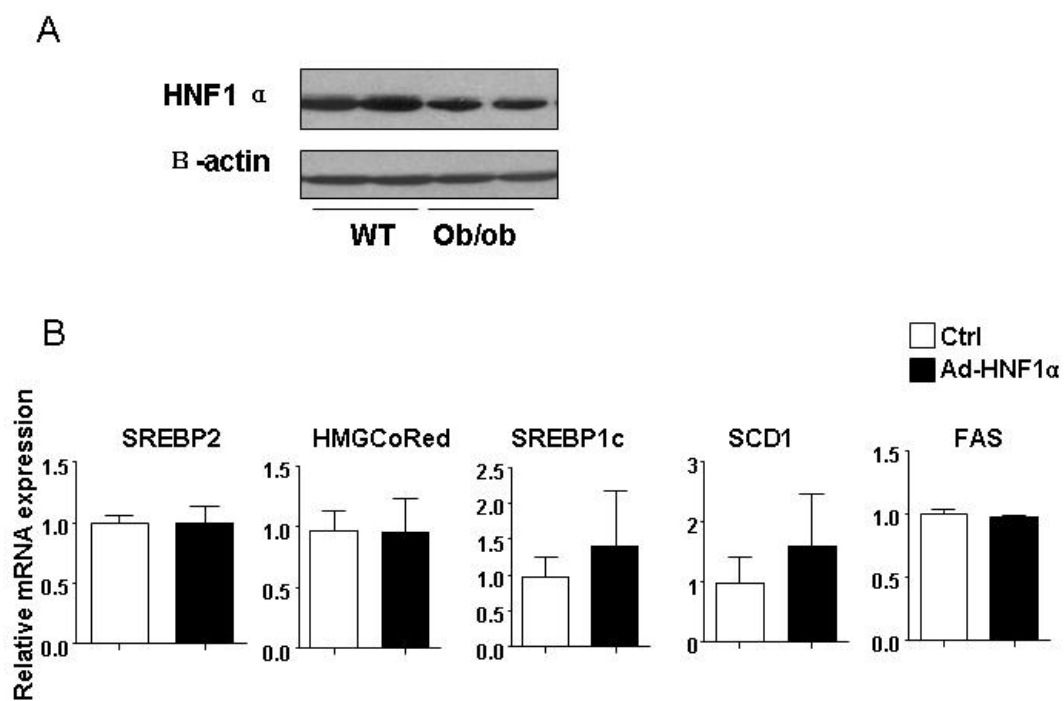

**FigureS4** (A) The expression of HNF1 $\alpha$  in ob/ob mice (B) The mRNA levels of *Srebp1c*, *Srebp2*, and their target genes in the mice of control or HNF1 $\alpha$  mice.

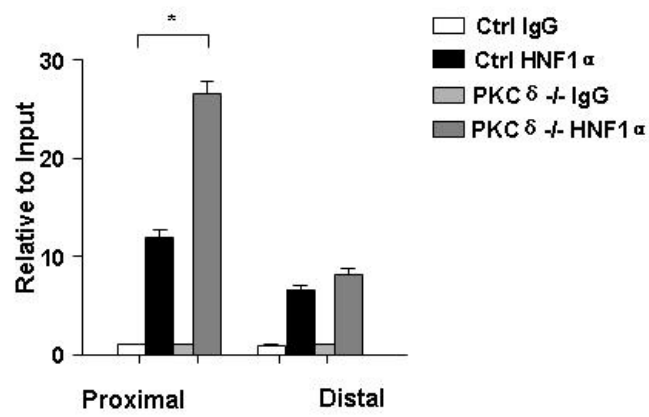

**FigureS5** *Pcsk9* promoter ChIP assay in the *TSC1*<sup>-/-</sup> MEFs with Ctrl or PKC $\delta$  siRNA using the HNF1 $\alpha$  or IgG antibody. \*P<0.05, N=3-4.

**FigSTable1**

| mRNA                   | Type    | Sequence 5'to 3'             |
|------------------------|---------|------------------------------|
| SREBP1c                | Forward | GGAGCCATGGATTGCACATT         |
|                        | Reverse | CCTGTCTCACCCCAGCATA          |
| SCD-1                  | Forward | CTGCAGGTTGTGCTAGATGGGATGG    |
|                        | Reverse | GCCTGGGGTCTTTGGTAAGTAGGC     |
| FAS                    | Forward | GGCATCATTGGGCACTCCTT         |
|                        | Reverse | GCTGCAAGCACAGCCTCTCT         |
| SREBP2                 | Forward | GTGCGTCTATCAAGTCCAGAATG      |
|                        | Reverse | GAGACTGTCTCCTTTCTGCCTCT      |
| HMG-CoARed             | Forward | CTTTCAGAAACGAACTGTAGCTCAC    |
|                        | Reverse | CTAGTGGAAGATGAATGGACATGAT    |
| HMG-CoASyn             | Forward | CAGCCATTTGTTACAGCTTATTCTC    |
|                        | Reverse | CTTTTAAATTGCCACATATTATTTAGAA |
| PCSK9                  | Forward | TTGCAGCAGCTGGGAACTT          |
|                        | Reverse | CCGACTGTGATGACCTCTGGA        |
| HNF1alpha              | Forward | GCACCAGAGACCCACGTGCC         |
|                        | Reverse | GGCTTCCCCTCAGCTCCCGA         |
| LDLR                   | Forward | CGCGGATCTGATGCGTCGCT         |
|                        | Reverse | CGGCCCTGGCAGTTCTGTGG         |
| ACCI                   | Forward | TGGACAGACTGATCGCAGAGAAAG     |
|                        | Reverse | TGGAGAGCCCCACACACA           |
| G6Phosphatase          | Forward | AGGGCTAGGGGTGGACCTCCT        |
|                        | Reverse | GGTGGACCCATTCTGGCCGC         |
| IDOL                   | Forward | AGGAGATCAACTCCACCTTCTG       |
|                        | Reverse | ATCTGCAGACCGGACAGG           |
| PCSK9 ChIP<br>Proximal | Forward | CCCCGAGCCCCATCGGAAGA         |
|                        | Reverse | AGGGCGAGGCCGAAACCTGA         |
| PCSK9 ChIP<br>Distal   | Forward | AGGCCAGGGGACTAAGCTGG         |
|                        | Reverse | CCAAGGTGGTGGGCTATGCGG        |
